# Supplementary material
Source: Springer Nature journal article supplement (https://www.springermedizin.de/resource/supplementary/12997_2012_114_MOESM1_ESM.pdf/9623340)

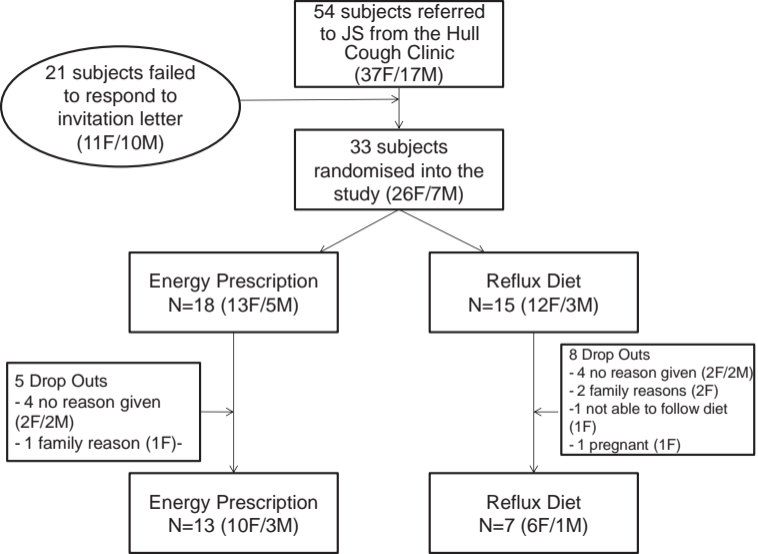

Supplement: MOESM1 [file 9623340]
